# Supplementary material for: Peripheral myelin protein 2 – a novel cluster of mutations causing Charcot-Marie-Tooth neuropathy
Source: Springer Nature journal article supplement (doi:10.1186/s13023-019-1162-x), 2019-08-14
Supplement: MOESM1 [file 17072248]

Table S1. Genomic defects and genes analyzed prior to WES.

| Gene                             | A.III-1 | B.II-2 |
|----------------------------------|---------|--------|
| <i>17p dupl.</i>                 | +       | +      |
| <i>PMP22</i>                     | +       | +      |
| <i>MPZ</i>                       | +       | +      |
| <i>GJB1</i>                      | +       | +      |
| <i>NDRG1</i>                     | +       | +      |
| <i>YARS</i>                      | +       |        |
| <i>GARS</i>                      | +       |        |
| <i>AARS</i>                      | +       |        |
| <i>MFN2</i>                      | +       |        |
| <i>GDAP1</i>                     | +       | +      |
| <i>SH3TC2</i>                    | +       |        |
| <i>HINT1</i>                     | +       |        |
| <i>BSCL2</i>                     | +       |        |
| <i>CTDP1</i>                     | +       |        |
| <i>DNM2</i>                      | +       |        |
| <i>FGD4</i>                      | +       |        |
| <i>GAN</i>                       | +       |        |
| <i>HSP22</i><br>( <i>HSPB8</i> ) | +       |        |
| <i>HSP27</i><br>( <i>HSPB1</i> ) | +       |        |
| <i>IGHMBP2</i>                   | +       |        |
| <i>GNB4</i>                      | +       |        |
| <i>LITAF</i>                     | +       |        |
| <i>MTMR2</i>                     | +       | +      |
| <i>NEFL</i>                      | +       |        |
| <i>NTRK1</i>                     | +       |        |
| <i>PRX</i>                       | +       |        |
| <i>RAB7</i>                      | +       |        |
| <i>SPTLC1</i>                    | +       |        |
| <i>SPTLC2</i>                    | +       |        |
| <i>TRPV4</i>                     | +       |        |

“+” - screening of the gene performed.

**Table S2. Primers used for *PMP2* screening.**

| Exon | Forward primer               | Reverse primer               |
|------|------------------------------|------------------------------|
| 1    | 5'-AGCCTTGCAAACTCCCCAG-3'    | 5'-TTGCTTAGTCCCGACACTGC-3'   |
| 2    | 5'-TGTCTCAGGAGGTACTCC-3'     | 5'-CCACTGAGCGTAGGATGTGG-3'   |
| 3    | 5'-AAAATCTTGGGTCAGTACTTGA-3' | 5'-TGGTTCATACTGAAAGAACTGC-3' |
| 4    | 5'-ACTGGAGACTGACATACTGAT-3'  | 5'-CTCCTCTGGCCCCTGTCA-3'     |

**Table S3. Scores from the pathogenicity prediction programs.**

| cDNA     | Protein     | SIFT<br>(max score 0) | PolyPhen2<br>(max score 1) | Mutation<br>Taster<br>(max score 1) | CADD<br>(>20) |
|----------|-------------|-----------------------|----------------------------|-------------------------------------|---------------|
| c.341T>C | p.Met114Thr | 0.01 (Del)            | 1 (PD)                     | 1 (DC)                              | 27.6          |
| c.344T>C | p.Val115Ala | 0.02 (Del)            | 0.923 (PD)                 | 1 (DC)                              | 25.3          |

Abbreviations: “Del” – deleterious, “DC” – disease causing, “PD” – probably damaging. A CADD score >20 suggests that the variant is amongst the top 1% of deleterious variants in the human genome.
